# Supplementary material
Source: PubMed Central journal article supplement (PMC10254901)
Supplement: NIHMS1852563-supplement-1852563_Sup_Info.pdf [file NIHMS1852563-supplement-1852563_Sup_Info.pdf]

**Table of Contents:**

- 1) Supplemental Table 1. First vaccination dose versus second vaccination dose with first vaccination dose as primary exposure.
- 2) Supplemental Table 2. ICD-9 and ICD-10 codes used to define diagnoses.

**Supplemental Table 1. First vaccination dose versus second vaccination dose with first vaccination dose as primary exposure.**

| Diagnosis               | First Dose |            |           |                  | Second Dose |            |           |                  |
|-------------------------|------------|------------|-----------|------------------|-------------|------------|-----------|------------------|
|                         | Total (N)  | Before (N) | After (N) | Odds (CI)        | Total (N)   | Before (N) | After (N) | Odds (CI)        |
| Dysautonomia            | 68         | 21         | 47        | 2.24 (1.34-3.86) | 68          | 30         | 38        | 1.27 (0.79-2.09) |
| POTS                    | 1264       | 501        | 763       | 1.52 (1.36-1.71) | 1184        | 481        | 703       | 1.46 (1.30-1.64) |
| Mast Cell Syndrome      | 64         | 27         | 37        | 1.37 (0.83-2.37) | 49          | 22         | 27        | 1.23 (0.69-2.27) |
| Ehlers Danlos           | 40         | 19         | 21        | 1.11 (0.60-2.08) | 35          | 14         | 21        | 1.5 (0.75-3.38)  |
| Fatigue                 | 3090       | 1377       | 1713      | 1.24 (1.16-1.34) | 2857        | 1237       | 1620      | 1.31 (1.22-1.41) |
| Hypertension            | 4638       | 2080       | 2558      | 1.23 (1.16-1.3)  | 4200        | 1875       | 2325      | 1.24 (1.17-1.32) |
| Diabetes                | 1269       | 600        | 669       | 1.12 (1.00-1.25) | 1141        | 550        | 591       | 1.07 (0.96-1.21) |
| Hyperlipidemia          | 4373       | 1952       | 2421      | 1.24 (1.17-1.32) | 4003        | 1771       | 2232      | 1.26 (1.18-1.34) |
| Myocarditis             | 25         | 7          | 18        | 2.57 (1.08-7.33) | 21          | 7          | 14        | 2 (0.91-6.00)    |
| Depression              | 1737       | 795        | 942       | 1.18 (1.08-1.30) | 1594        | 726        | 868       | 1.2 (1.08-1.32)  |
| Anxiety                 | 2929       | 1316       | 1613      | 1.23 (1.14-1.32) | 2659        | 1182       | 1477      | 1.25 (1.16-1.35) |
| Eczema                  | 1799       | 844        | 955       | 1.13 (1.03-1.24) | 1586        | 741        | 845       | 1.14 (1.03-1.26) |
| Cellulitis              | 1799       | 844        | 955       | 1.13 (1.03-1.24) | 1586        | 741        | 845       | 1.14 (1.03-1.26) |
| Urinary Tract Infection | 2038       | 879        | 1159      | 1.32 (1.21-1.44) | 1914        | 828        | 1086      | 1.31 (1.20-1.44) |
| Iron Deficiency Anemia  | 1688       | 757        | 931       | 1.23 (1.12-1.35) | 1566        | 700        | 866       | 1.24 (1.12-1.37) |
| GERD                    | 2795       | 1308       | 1487      | 1.14 (1.06-1.23) | 2562        | 1161       | 1401      | 1.21 (1.12-1.30) |
| Osteoarthritis          | 178        | 74         | 104       | 1.41 (1.05-1.92) | 179         | 65         | 114       | 1.75 (1.29-2.38) |
| Lumbago                 | 2845       | 1256       | 1589      | 1.27 (1.18-1.36) | 2678        | 1134       | 1544      | 1.36 (1.26-1.47) |
| Edema                   | 1196       | 533        | 663       | 1.24 (1.11-1.40) | 1118        | 470        | 648       | 1.38 (1.23-1.55) |
| Headache                | 2292       | 1096       | 1196      | 1.09 (1.01-1.18) | 2043        | 1011       | 1032      | 1.02 (0.94-1.11) |
| Total POTS Group        | 4526       | 1945       | 2581      | 1.33 (1.25-1.41) | 4193        | 1784       | 2409      | 1.35 (1.27-1.44) |
| Total CPC Group         | 31576      | 14334      | 17242     | 1.2 (1.18-1.23)  | 28829       | 12955      | 15874     | 1.23 (1.20-1.25) |

*POTS: Postural Orthostatic Tachycardia Syndrome; GERD: Gastroesophageal Reflux Disease; CPC: Common Primary Care.* Odds of post-exposure diagnosis were estimated using 1-sample proportions testing with continuity correction.

**Supplemental Table 2. ICD-9 and ICD-10 codes used to define diagnoses.**

| Diagnosis               | ICD-9                                                                                                                                                                                         | ICD-10                                                                                                                                                                                                                                                                                                                                                       |
|-------------------------|-----------------------------------------------------------------------------------------------------------------------------------------------------------------------------------------------|--------------------------------------------------------------------------------------------------------------------------------------------------------------------------------------------------------------------------------------------------------------------------------------------------------------------------------------------------------------|
| Myocarditis             | 032.82, 036.43, 074.23, 130.3, 391.2, 398.0, 422.0, 422, 422.9, 422.90, 422.91, 422.93, 422.99, 429.0                                                                                         |                                                                                                                                                                                                                                                                                                                                                              |
| Dysautonomia            | 337.9                                                                                                                                                                                         | G90.1                                                                                                                                                                                                                                                                                                                                                        |
| POTS                    | 427.89                                                                                                                                                                                        | I49.8                                                                                                                                                                                                                                                                                                                                                        |
| Mast Cell Disorders     |                                                                                                                                                                                               | D89.4                                                                                                                                                                                                                                                                                                                                                        |
| Urinary Tract Infection | 595.0, 599.0                                                                                                                                                                                  |                                                                                                                                                                                                                                                                                                                                                              |
| Dizziness               | 780.4                                                                                                                                                                                         | R42                                                                                                                                                                                                                                                                                                                                                          |
| Lumbago                 | 724.1, 724.2, 724.20, 724.5                                                                                                                                                                   |                                                                                                                                                                                                                                                                                                                                                              |
| Fatigue                 | 780.79                                                                                                                                                                                        | R53.83                                                                                                                                                                                                                                                                                                                                                       |
| Edema                   | 782.3, 782.30                                                                                                                                                                                 |                                                                                                                                                                                                                                                                                                                                                              |
| Hyperlipidemia          | 272.2, 272.4,                                                                                                                                                                                 | E78.2, E78.4, E78.5                                                                                                                                                                                                                                                                                                                                          |
| Hypertension            | 401.*, 402.*, 403.*, 404.*, 405.*                                                                                                                                                             | I10.*, I11.*, I12.*, I13.*, I15.*                                                                                                                                                                                                                                                                                                                            |
| Iron Deficiency Anemia  | 280, 280.0, 280.1, 280.8, 280.9                                                                                                                                                               |                                                                                                                                                                                                                                                                                                                                                              |
| Anxiety                 | 293.84, 300, 300.0, 300.00, 300.02, 300.09, 300.10, 300.2, 300.5, 300.89, 300.9, 313.0, 313.1, 313.21, 313.3, 313.82, 313.83                                                                  |                                                                                                                                                                                                                                                                                                                                                              |
| Depression              | 296.2, 296.20, 296.21, 296.22, 296.23, 296.24, 296.25, 296.26, 296.3, 296.30, 296.31, 296.32, 296.33, 296.34, 296.35, 296.36, 311, 311.0                                                      |                                                                                                                                                                                                                                                                                                                                                              |
| GERD                    | 530.1, 530.10, 530.12, 530.19, 530.81                                                                                                                                                         |                                                                                                                                                                                                                                                                                                                                                              |
| Cellulitis              | 681, 681.0, 681.00, 681.01, 681.02, 681.1, 681.10, 681.11, 681.9, 682, 682.0, 682.1, 682.2, 682.3, 682.4, 682.5, 682.6, 682.7, 682.8, 682.9                                                   |                                                                                                                                                                                                                                                                                                                                                              |
| Eczema                  | 691, 691.8, 692, 692.0, 692.1, 692.2, 692.3, 692.4, 692.8, 692.81, 692.83, 692.84, 692.89, 692.9, 693, 693.0, 693.8, 693.9, E866.7                                                            |                                                                                                                                                                                                                                                                                                                                                              |
| Diabetes Mellitus       | 250, 250.00, 250.0, 250.1, 250.2, 250.3, 250.4, 250.5, 250.6, 250.7, 250.8, 250.9,                                                                                                            | E10.0, E10.1, E10.2, E10.3, E10.4, E10.5, E10.6, E10.7, E10.8, E10.9, E11.0, E11.1, E11.2, E11.3, E11.4, E11.5, E11.6, E11.7, E11.8, E11.9, E12.0, E12.1, E12.2, E12.3, E12.4, E12.5, E12.6, E12.7, E12.8, E12.9, E13.0, E13.1, E13.2, E13.3, E13.4, E13.5, E13.6, E13.7, E13.8, E13.9, E14.0, E14.1, E14.2, E14.3, E14.4, E14.5, E14.6, E14.7, E14.8, E14.9 |
| Ehlers Danlos Syndrome  | 756.83                                                                                                                                                                                        | Q79.60                                                                                                                                                                                                                                                                                                                                                       |
| Headache                | 339, 339.05, 339.09, 339.1, 339.10, 339.11, 339.12, 339.2, 339.20, 339.21, 339.22, 339.3, 339.4, 339.41, 339.42, 339.43, 339.44, 339.8, 339.81, 339.82, 339.83, 339.84, 339.85, 339.89, 784.0 |                                                                                                                                                                                                                                                                                                                                                              |

*POTS: Postural Orthostatic Tachycardia Syndrome; GERD: Gastroesophageal Reflux Disease.*
